# Supplementary material
Source: publisher figshare collection journal article supplement (https://acs.figshare.com/ndownloader/files/3604968)
Supplement: Supplementary file 1 [file 3604968]

## Supporting information

### **Interfacial structure of immobilized antibodies and perdeuterated HSA in model pregnancy tests measured with neutron reflectivity**

Benjamin J. Cowsill,<sup>a</sup> Xiubo Zhao,<sup>b</sup> Thomas A. Waigh,<sup>a</sup> Saji Eapen,<sup>c</sup> Robert Davies,<sup>c</sup> Valerie Laux,<sup>d</sup> Michael Haertlein,<sup>d</sup> V. Trevor Forsyth,<sup>d,e</sup> and Jian R. Lu\*<sup>a</sup>

<sup>a</sup>Biological Physics Group, School of Physics and Astronomy, The University of Manchester, Schuster Building, Manchester, M13 9PL, UK.

<sup>b</sup>Department of Chemical and Biological Engineering, The University of Sheffield, Mappin Street, Sheffield S1 3JD, UK

<sup>c</sup>SPD Development Company Ltd., Bedford, UK

<sup>d</sup>Institut Laue Langevin, 6 rue Jules Horowitz, 38042 Grenoble, France

<sup>e</sup>EPSAM/ISTM, Keele University, Staffordshire ST5 5BG, UK

\* To whom all correspondence should be made. E-mail: j.lu@manchester.ac.uk; Tel: +44 (0)161 3063926

The immunoassay described in the main text was repeated but with the d-HSA blocker replaced with h-HSA. The fitted parameters are shown in table S1.

Table S1. Fitted parameters for an antibody/h-HSA/hCG immunoassay using the best fitting models and the optical matrix method. A D<sub>2</sub>O buffer was used throughout.

|          | Layer No. | Thickness (nm) | SLD ( $\times 10^{-6} \text{ A}^{-2}$ ) | Volume fraction | Surface coverage ( $\text{mg}/\text{m}^2$ ) |
|----------|-----------|----------------|-----------------------------------------|-----------------|---------------------------------------------|
| Antibody | 1         | 3.5            | 5.26                                    | 0.361           | 1.91                                        |
|          | 2         | 2.5            | 6.06                                    | 0.096           | 0.36                                        |
| h-HSA    | 1         | 3.2            | 4.90                                    | 0.119           | 0.53                                        |
|          | 2         | 2.9            | 6.00                                    | 0.020           | 0.08                                        |
| hCG      | 1         | 3.2            | 4.70                                    | 0.068           | 0.17                                        |
|          | 2         | 2.9            | 6.00                                    | 0               | 0                                           |

Tables S2 and S3 show the fitted parameters for the low and high antibody surface coverages shown in Figure 7 in the main text. Both experiments were performed in D<sub>2</sub>O.

Table S2. Fitted parameters for a low surface coverage antibody film with subsequent d-HSA co-adsorption and hCG binding.

|          | Layer No. | Thickness (nm) | SLD ( $\times 10^{-6} \text{ A}^{-2}$ ) | Volume fraction | Surface coverage ( $\text{mg}/\text{m}^2$ ) |
|----------|-----------|----------------|-----------------------------------------|-----------------|---------------------------------------------|
| Antibody | 1         | 3.5            | 6.15                                    | 0.066           | 0.35                                        |
| d-HSA    | 1         | 4.5            | 6.34                                    | 0.181           | 1.13                                        |
| hCG      | 1         | 4.4            | 6.19                                    | 0.051           | 0.18                                        |

Table S3. Fitted parameters for a high surface coverage antibody film with subsequent d-HSA co-adsorption and hCG binding.

|          | Layer No. | Thickness (nm) | SLD ( $\times 10^{-6} \text{ A}^{-2}$ ) | Volume fraction | Surface coverage ( $\text{mg}/\text{m}^2$ ) |
|----------|-----------|----------------|-----------------------------------------|-----------------|---------------------------------------------|
| Antibody | 1         | 3.4            | 5.28                                    | 0.354           | 1.82                                        |
|          | 2         | 2.8            | 5.96                                    | 0.136           | 0.57                                        |
| d-HSA    | 1         | 2.2            | 5.72                                    | 0.286           | 0.88                                        |
|          | 2         | 2.8            | 5.94                                    | 0               | 0                                           |
| hCG      | 1         | 3.1            | 5.50                                    | 0.075           | 0.19                                        |
|          | 2         | 2.9            | 5.94                                    | 0               | 0                                           |
